# Supplementary material for: Mucosal Immunization with Iron Receptor Antigens Protects against Urinary Tract Infection
Source: PubMed Central journal article supplement (PMC2736566; doi:10.1371/journal.ppat.1000586), 2009-09-18

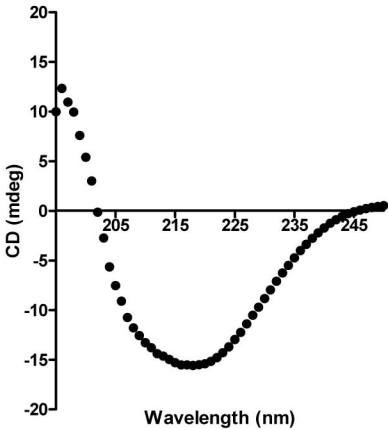

Supplement: ppat.1000586.s001.pdf [file ppat.1000586.s001.pdf]
